1 **Prevalence of sustainable and unsustainable use of wild species inferred from the IUCN**  
2 **Red List**

3

4 Sophie M.E. Marsh<sup>1</sup>, Michael Hoffmann<sup>2</sup>, Neil D. Burgess<sup>3,4</sup>, Thomas M. Brooks<sup>5,6,7</sup>, Daniel  
5 W.S. Challender<sup>8</sup>, Patricia J. Cremona<sup>9</sup>, Craig Hilton-Taylor<sup>9</sup>, Flore Lafaye de Micheaux<sup>5,10,11</sup>,  
6 Gabriela Lichtenstein<sup>12</sup>, Dilys Roe<sup>13</sup>, Monika Böhm<sup>14</sup>

7

8 **Author information**

- 9 1. Centre for Biodiversity and Environment Research, Department of Genetics, Evolution and  
10 Environment, University College London, Gower Street, London WC1E 6BT, UK.  
11 [Sophie.marsh19@alumni.ucl.ac.uk](mailto:Sophie.marsh19@alumni.ucl.ac.uk)  
12 2. Conservation and Policy, Zoological Society of London, Regent's Park, London, NW1 4RY.  
13 [Mike.hoffmann@zsl.org](mailto:Mike.hoffmann@zsl.org)  
14 3. UNEP-WCMC, 219 Huntington Road, CB3 0DL, Cambridge, UK  
15 4. CMEC, GLOBE Institute, University of Copenhagen, Denmark  
16 5. International Union for Conservation of Nature, Gland, Switzerland.  
17 6. World Agroforestry Center (ICRAF), University of the Philippines, Los Baños, The  
18 Philippines.  
19 7. Institute for Marine and Antarctic Studies, University of Tasmania, Hobart, Australia.  
20 8. Department of Zoology, University of Oxford, Zoology Research and Administration  
21 Building, 11a Mansfield Road, Oxford, OX1 3SZ, United Kingdom  
22 9. International Union for Conservation of Nature, Cambridge, UK  
23 10. Institute of Geography and Sustainability, University of Lausanne, Switzerland  
24 11. French Institute of Pondicherry, India  
25 12. Instituto Nacional de Antropología y Pensamiento Latinoamericano (INAPL)/CONICET,  
26 Argentina  
27 13. International Institute for Environment and Development (IIED) and IUCN Sustainable Use  
28 and Livelihoods Specialist Group (SULi), London UK  
29 14. Institute of Zoology, Zoological Society of London, Regent's Park, London, NW1 4RY.  
30

31 **Keywords**

32 Policy, wildlife, (un)sustainable use, exploitation, IPBES, Convention on Biological Diversity,  
33 CITES, conservation action

34

35 **Running head**

36 Use of wild species

37

38 **Article impact statement**

39 Use is likely unsustainable for 16%, likely sustainable for 36%, and undetermined for 48% of  
40 ~10,000 wild species analyzed on the Red List.

41 **Abstract**

42

43 Unsustainable exploitation of wild species represents a serious threat to biodiversity and to the

44 livelihoods of local communities and indigenous peoples. However, managed, sustainable use

45 has the potential to forestall extinctions, aid recovery, and meet human needs. Here, we infer

46 current prevalence of unsustainable and sustainable biological resource use among species

47 groups; research to date has focused on the former with little consideration of the latter. We

48 analyzed species-level data for 30,923 species from 13 taxonomic groups comprehensively

49 assessed on the IUCN Red List. Our results demonstrate the broad taxonomic prevalence of use,

50 with 40% of species (10,098 of 25,009 from 10 taxonomic groups with adequate data)

51 documented as being used. The main purposes of use are pets, display animals and horticulture,

52 and human consumption. Use is often biologically unsustainable: intentional use is currently

53 considered to be contributing to elevated extinction risk for more than one quarter of all

54 threatened or Near Threatened (NT) species (2,752 – 2,848 of 9,753 species). Of the species used

55 and traded, intentional use threatens 16% (1,597 – 1,631 of 10,098 species). However, 36% of

56 species that are used (3,651 of 10,098 species) have either stable or improving population trends

57 and do not have biological use documented as a threat, including 172 threatened or NT species. It

58 is not yet inferable whether use of the remaining 48% of species is sustainable; we make

59 suggestions for improving use-related Red List data to elucidate this. Around a third of species

60 that have use documented as a threat are not currently receiving any species management actions

61 that directly address this threat. Our findings on the prevalence of sustainable and unsustainable

62 use, and variation across taxa, are important for informing international policymaking, including

63 IPBES, the Convention on Biological Diversity, and the Convention on International Trade in  
64 Endangered Species.

65

## 66 **Introduction**

67

68 It is critical to understand and manage the impacts of threats related to the use of wild species to  
69 ensure their survival while continuing to support global demand for biological resources. Over-  
70 exploitation is among the predominant threats to many species (Maxwell et al., 2016; di Minin et  
71 al. 2019), and the primary threat to aquatic species (IPBES 2019). Nonetheless, billions of people  
72 rely on wild species, including plants, animals and fungi, for their food, medicines, construction  
73 and other uses (e.g. Nasi et al. 2011; Thilsted et al. 2016). Indeed, the use of wild species  
74 underpins the livelihoods of millions of people and has cultural, religious and recreational value.  
75 These values in turn provide a local incentive for the conservation of species. The tension  
76 between over-exploitation as a major driver of biodiversity loss and humanity's reliance on wild  
77 species for many different needs creates a conundrum: how can use be managed in a sustainable  
78 way that helps meet human needs and incentivizes conservation, rather than further driving  
79 species to extinction?

80

81 The use of wild species can be sustainable given adequate management (e.g. Lichtenstein 2010;  
82 Austin & Corey 2012); indeed, the concept of sustainable use is embedded in many international  
83 and national regulatory and policy frameworks as a conservation management tool, to promote  
84 human development, and to ensure availability of natural resources for future generations. It is  
85 one of the three primary objectives of the Convention on Biological Diversity (CBD), and is

86 explicit in the UN Sustainable Development Goals. Nonetheless, sustainable use as a practice  
87 remains a polarizing debate (Hutton & Leader-Williams 2003; Challender & MacMillan 2019),  
88 especially consumptive use of animals (i.e. involving the removal of either live or dead  
89 individuals), and one with limited consensus regarding the effectiveness of different approaches.  
90 This issue is exacerbated in equal parts by concerns that inaction or ineffective sustainable use  
91 policies could rapidly imperil many already threatened species (e.g. Auliya et al. 2016);  
92 conversely, actions to prevent or reduce use could have negative consequences (Cooney &  
93 Jepson 2006; Bonwitt et al. 2018), including for people who depend on their use and particularly  
94 those who are most vulnerable.

95

96 The discourse around sustainable use is hampered further by knowledge gaps. We have limited  
97 understanding of different patterns of use within species, the degree to which use might be  
98 sustainable or unsustainable (and which dimensions of sustainability are affected by use), and the  
99 degree to which species currently being impacted by over-exploitation are receiving appropriate  
100 conservation actions. The IUCN Red List of Threatened Species (henceforth ‘Red List’) provides  
101 data that can assist managers and policymakers in understanding and delivering targeted action  
102 to address threats to biodiversity. The role of the Red List in supporting and influencing global  
103 policy instruments is well established, from tracking progress against globally agreed targets  
104 such as the CBD Aichi Targets (SCBD 2014) – and new targets under discussion in the post-  
105 2020 Global Biodiversity Framework – and Sustainable Development Goals (Brooks et al.  
106 2015), to providing key data and trends that inform processes such as those under the Convention  
107 on International Trade in Endangered Species of Fauna and Flora (CITES; e.g. Challender et al.

108 2019) and the Intergovernmental Science-Policy Platform on Biodiversity and Ecosystem  
109 Services (IPBES; Brooks et al. 2016; IPBES 2019).

110

111 Individual Red List assessments are carried out by thousands of scientific experts in accordance  
112 with a system of objective, quantitative categories and criteria that rank a species' extinction risk  
113 from Least Concern (LC) to Extinct in the Wild (EW) or Extinct (EX). A species is considered  
114 threatened if it is assessed as Vulnerable (VU), Endangered (EN), or Critically Endangered (CR).  
115 Assessments follow well-defined guidelines with an independent process for review (Collen et  
116 al. 2016), and are underpinned by ancillary data on distribution, population size and trend,  
117 habitat preferences, threats and conservation actions in place or needed. Much of this  
118 information is coded in standardized classification schemes that enable comparative analyses  
119 across taxa.

120

121 Previous analyses of biological resource use using Red List data have focused on individual  
122 taxonomic groups (e.g. birds, Butchart 2008; cacti, Goettsch et al. 2015), or on particular  
123 dimensions of use (e.g. traded vertebrates, Scheffers et al. 2019; spatial concentrations of  
124 unsustainable use, di Minin et al. 2019). Here, we investigate patterns of biological resource use  
125 across a broad suite of species in comprehensively assessed taxa on the Red List to address: i)  
126 the main purposes of use of wild animal and plant species recorded in the Red List; ii) for which  
127 species are current levels of use having a negative impact on species populations, and hence  
128 likely biologically unsustainable; iii) for which species are current levels of use not having a  
129 negative impact on populations, and hence likely biologically sustainable; and iv) for which  
130 utilized species are conservation actions currently in place to directly target impacts from current

131 levels of use. Our study substantially advances previous analyses of Red List data, provides a  
132 framework for replicating the results in the future (for example, to track trends over time), and  
133 yields concrete suggestions for improving the quality of use-related Red List data in future  
134 assessments.

135

## 136 **Methods**

137

### 138 **Species data**

139

140 We collated species-level data for 13 taxonomic groups that have been comprehensively assessed  
141 on the Red List (version 2020-1). The Red List defines comprehensively assessed groups as  
142 taxonomic groups that include at least 150 species, of which >80% have been assessed (IUCN  
143 2020). Excluding non-comprehensively assessed groups, which may primarily focus on species  
144 that are likely threatened, or may have a regional focus, avoids introducing bias into our analysis,  
145 e.g. as threat processes affecting species are usually not evenly distributed across space  
146 (Miqueleiz et al. 2020).

147

148 We classed the 13 taxonomic groups into six primarily aquatic (freshwater and/or marine) and  
149 seven primarily terrestrial groups (including amphibians, among which ~30% are documented as  
150 terrestrial only, the remainder as both terrestrial and freshwater). We excluded all species listed  
151 as Extinct (EX) or Extinct in the Wild (EW), as neither can be currently used in the wild, or Data  
152 Deficient (DD), as the impact of any use on their extinction risk is unknown. This restricted our  
153 analyses to LC, Near Threatened (NT), and threatened species only (hereafter, extant, data

154 sufficient species). This dataset comprises 30,923 species, made up of 6,603 primarily aquatic  
155 species and 24,320 primarily terrestrial species (Table 1; Supporting Information).

156

157 Red List data used

158

159 For each species, we downloaded the following coded data from the Red List: Red List category,  
160 current population trend, threats, use and trade, and conservation actions in place. Documenting  
161 current population trend is required information for all assessed species on the Red List and is  
162 presented as either stable, decreasing, increasing, or unknown. Use of species is captured on the  
163 Red List in two ways: as a threat under the Threats Classification Scheme (Class 5, Biological  
164 Resource Use; Salafsky et al. 2008; Supporting Information), and as a form of use or trade under  
165 the Use and Trade Classification Scheme, which explicitly does not associate the use with a  
166 threat (Supporting Information). While the coding of major threats impacting a species is  
167 required documentation for species listed as EX, EW, threatened, and NT (IUCN 2016), coding  
168 of use and trade is only recommended documentation and may thus not be consistently coded  
169 across all species on the Red List, including for comprehensively assessed groups. Conservation  
170 actions are coded as both actions in place and actions needed (Salafsky et al. 2008), but are  
171 recommended documentation only, and thus may not be consistently coded (Luther et al. 2016).  
172 For our analysis, we only considered conservation actions that were already in place.

173

174 Analyses

175

176 *Main purposes of use of wild animal and plant species recorded on the Red List*

177 We investigated the prevalence of different purposes of use based on the information coded in  
178 the Use and Trade Classification Scheme, excluding records for “establishing ex situ production”  
179 (use code 16), “other” (17), and “unknown” (18). For this analysis, we limited our dataset to 10  
180 taxonomic groups that have adequate recording of use and trade, leading us to exclude  
181 cartilaginous fishes and cephalopods from the aquatic species group and mammals (a high-  
182 profile group when it comes to discussion of use) from the terrestrial group (Supporting  
183 Information). For each taxonomic group, we calculated the total number of species recorded as  
184 being used for at least one purpose in the Use and Trade Classification Scheme, and summarized  
185 the data as the percentage of extant, data sufficient species recorded for different types of use on  
186 the Red List (Supporting Information).

187

#### 188 *Identifying wild species for which intentional use is having a negative impact*

189 For our analysis, we consider use to be biologically unsustainable when it is likely to be having  
190 an adverse impact on species extinction risk. To identify such cases, we analyzed the proportion  
191 of i) all species with at least one purpose of use coded (from among the 10 taxonomic groups  
192 with adequate data), and ii) all NT and threatened species (from among all 13 taxonomic groups  
193 comprehensively assessed), for which “biological resource use” is documented as a major threat,  
194 as recorded using the IUCN Threat Classification Scheme. Since not all types of biological  
195 resource use are directly targeted at the species in question, and hence intentional, we developed  
196 a decision-tree for removing those types of threats that are not relevant to an analysis of direct  
197 use of species (Supporting Information). In some cases, we were unable to determine whether the  
198 use was intentional. We present this uncertainty in our results as a range where the “minimum”  
199 proportion includes all species with threats that could be conclusively determined as intentional,



200 and the “maximum” proportion additionally includes those species with motivation unknown or  
201 unrecorded that may represent further cases of intentional biological resource use. For groups  
202 where no species have such motivation unknown / unrecorded threats, we present only the  
203 minimum (Supporting Information).

204

205 We included biological resource use as a threat if it had a medium to high impact on species  
206 extinction risk. The Red List uses a scoring system to derive threat impact, based on timing,  
207 scope, and severity of the threat. This information is used to create an overall threat impact score.  
208 Threat timing is recommended information to be provided in the Red List assessment, while  
209 severity and scope are discretionary. As such, we amended the impact score categorization to  
210 help exclude threats that are not likely to be major (Supporting Information).

211

#### 212 *Identifying wild species for which intentional use is not having a negative impact*

213 We considered use to be biologically sustainable when it is unlikely to have an adverse impact  
214 on species extinction risk. Due to data constraints, we could only derive a minimum estimate by  
215 determining the number of species recorded as being subject to some form of use or trade that: i)  
216 are also currently LC and not declining (i.e., have either stable or increasing current population  
217 trends); and ii) are threatened or NT and have stable or increasing population trends and are not  
218 documented as having intentional use as a major threat. We confined analyses to those 10  
219 taxonomic groups for which use and trade information was adequate, as discussed above.

220

#### 221 *Conservation actions in place or lacking for utilized wild species*

222 To understand the current level of conservation actions in place to respond to over-exploitation,  
223 we extracted all NT and threatened species that are documented as receiving targeted species  
224 management actions, as coded via the Red List's Conservation Actions Classification Scheme.  
225 Specifically, we selected species for which there is a harvest management plan in place and  
226 species subject to any international management / trade controls (e.g., CITES or US Endangered  
227 Species Act listing, regional fisheries agreements). We then determined the number of species  
228 that are threatened by biological resource use, and: i) are coded as receiving either one or both of  
229 these actions, and ii) are not receiving either of these conservation management actions.

230

231

## 232 **Results**

233

234 How many wild species are used, and what are the main purposes of use?

235

236 Among the 10 taxonomic groups with adequate information, the proportion of extant, data  
237 sufficient species documented as having at least one purpose of use coded ranged from 15%  
238 (crustaceans) to nearly 100% of cone snails (544 of 545 species) among primarily aquatic  
239 groups, and 11% (amphibians) to 76% (conifers) among primarily terrestrial groups. Across the  
240 25,009 species in these 10 groups, 10,098 (40%) had some purpose of use documented.

241

242 In the aquatic groups, the top purposes of use were for human food (bony fishes and  
243 crustaceans), specimen collection (cone snails), and pets and display animals (corals and bony  
244 fishes) (Supporting Information). Additional purposes of use were for handicrafts and jewelry

245 (cone snails and corals) and medical purposes (cone snails). For terrestrial animal groups, the  
246 two most prevalent uses were for pets or display animals and for human consumption  
247 (Supporting Information). This was followed by sport hunting and specimen collecting for birds,  
248 medicinal purposes for amphibians and wearing apparel / accessories for reptiles. For plant  
249 taxonomic groups, the predominant uses were for structural and building materials (conifers) and  
250 horticulture (all three groups). Overall, plant groups were used for more purposes than animal  
251 groups, including for human and animal food, medicinal use, household goods and handicrafts /  
252 jewelry, fuels and chemicals.

253

254 How many and which species are negatively impacted by intentional use?

255

256 Considering all 10,098 species for which some purpose of use is documented, a sixth have  
257 intentional biological resource use documented as a threat (1,597 – 1,631 species or 16%).  
258 Moreover, more than a quarter of all NT and threatened species, across all 13 comprehensively  
259 assessed taxa, have intentional biological resource use documented as a threat (minimum = 2,752  
260 species or 28%; maximum = 2,848 or 29%, out of 9,753 threatened and NT species overall).

261

262 Across NT and threatened species, a higher overall proportion of aquatic species than terrestrial  
263 species have intentional biological resource use coded as a threat (Fig. 2). Among aquatic  
264 groups, the taxa with highest prevalence are corals (100%; 388 species) and almost all  
265 cartilaginous fishes (99%; 314 out of 318 species), with fishing the predominant threat  
266 (Supporting Information); in the terrestrial groups, cycads appear most impacted (58 – 60%, 147  
267 – 152 of 255 species), largely due to gathering (147 species).

268

269 How many and which species are not negatively impacted by intentional use?

270

271 Among the 10 taxonomic groups for which information was adequate, most species subjected to  
272 some form of use or trade were LC, with the exception of cycads and corals. The overall  
273 percentage of utilized species that were LC was 72%, ranging from 16% and 35% in cycads and  
274 corals, respectively, to 76% in crustaceans, 77% in birds, 88% in cone snails and 90% in bony  
275 fishes (Fig. 3). Among terrestrial groups, between 11% (cycads, 20 species) and 42% (birds and  
276 dicots, 2,120 and 462 species, respectively) of utilized species are LC with either stable or  
277 increasing population trends. For aquatic groups, proportions are lower, ranging from 1% (corals,  
278 6 species) to 30% (bony fishes, 413 species). Across all 10 taxa for which data on purpose of use  
279 are adequate, 34% (3,469 of 10,098) of utilized species are LC and not declining. Furthermore,  
280 even among threatened and NT species we documented 172 species (2%) subject to some form  
281 of use that exhibit stable or increasing population trends and are not impacted by intentional  
282 biological resource use (Supplementary Information).

283

284 Conservation actions in place or lacking for utilized species

285

286 No information on species management actions relevant to use is recorded for NT or threatened  
287 corals, cone snails and cephalopods (Table 1), while only 1% of amphibians (26 species) and 8%  
288 of crustaceans (46 species) have available information on harvest management actions, and 3%  
289 of amphibians (82 species) and 1.1% of crustaceans (6 species) have recorded data on  
290 international trade controls (Supporting Information). On the other hand, over 80% of conifers,

291 reptiles, and cycads and 100% of birds have at least one of these conservation actions coded.  
292 Among threatened and NT species impacted by intentional use and with at least one of these  
293 actions coded, cycads, reptiles, mammals and dicots all have >80% of species documented as  
294 being subject to some form of international trade control (Supporting Information). Species  
295 groups are more likely to receive international trade controls than harvest management actions,  
296 but conifers, bony fishes and cartilaginous fishes are all as likely to receive harvest management  
297 interventions as international trade control measures (Fig. 4).

298

299 In total, out of at least 2,752 threatened and NT species that have intentional biological resource  
300 use coded as a threat (1,599 of which have available documentation for one or both conservation  
301 actions), fewer than a thousand (985 – 989) are documented as benefitting from either  
302 international trade control or species harvest management interventions; at least 206 species are  
303 explicitly stated as lacking any such actions (Supporting Information). Compared with terrestrial  
304 groups, species in aquatic groups are more likely to be lacking any conservation management in  
305 response to biological resource use.

306

307

## 308 **Discussion**

309

310 While previous analyses of Red List data have mostly examined the degree to which biological  
311 resource use is a threatening process driving extinction risk (which we further expand on here),  
312 our study provides a first attempt to analyze Red List data to understand the extent to which use  
313 of wild species is *not* having a detrimental impact on species extinction risk and hence might

314 currently be biologically sustainable. Although our analyses were hindered by data constraints,  
315 our findings that more than one-third each of birds, reptiles, conifers and dicots that are used are  
316 currently categorized as Least Concern and exhibit either stable or increasing population trends  
317 indicates that, at least at the time of assessment, use is not contributing to an increase in  
318 extinction risk. These proportions are substantially higher when accounting for all Least Concern  
319 species, whether their current population trend is increasing or declining. We also find evidence  
320 that some threatened and NT species that are used have stable or increasing population trends. Of  
321 course, the Red List assessment concerns the species across its range, and consequently it is  
322 possible that, despite overall population trends, some species could be undergoing localized  
323 declines due to the impacts of biological resource use or localized increases due to successful  
324 interventions.

325

326 In general, our results reiterate the broad extent of use of wild species. Across the assessed  
327 groups, a predominant form of use is for pets, display and / or horticultural use, followed by  
328 hunting or collection for food. Among birds, the primary factor explaining the predominance of  
329 pets is the live cage-bird trade, which has emerged as a major driver of declines among  
330 passerines, particularly in Southeast Asia (e.g., Eaton et al. 2017). Meanwhile, cacti have long  
331 been sought after for the horticultural trade and by private collectors for their ornamental value  
332 and their perceived rarity, with both seeds and mature individuals collected (Goettsch et al.  
333 2015). Since use and trade is not always consistently coded on the Red List, especially for non-  
334 threatened species, we cannot be conclusive about the full extent of use, or prevalence of  
335 different types of use, in all comprehensively assessed taxonomic groups. However, our initial

336 results confirm some taxon-specific investigations into the use of wild species, such as trees  
337 where, besides timber, the use is often for horticultural purposes (e.g., Beech et al. 2017).

338

339 While our results indicate that more species are *not* being impacted detrimentally by use than are,  
340 we also show that intentional biological resource use is a major threat, contributing towards an  
341 increased risk of extinction for more than a quarter of NT and threatened species. The proportion  
342 of species threatened by biological resource use is generally higher in aquatic taxa than among  
343 terrestrial taxa. While the impact of fisheries is well established for bony and cartilaginous fishes  
344 (Dulvy et al. 2014; MacNeil et al. 2020), the high proportion of corals and cone snails threatened  
345 by biological resource use is generally explained by the increasing removal and harvest of corals  
346 for display in aquariums and for the curio-trade in the former (Bruckner 2000, Cannas et al.  
347 2019), and by bioprospecting for conotoxin research and shell collecting in the latter (Peters et  
348 al. 2013).

349

350 Perhaps the starkest result of our analyses is that many species that are impacted by biological  
351 resource use are not currently documented as receiving any management actions that directly  
352 address this threat. The relatively high proportion of species subject to international trade  
353 controls can be explained by the fact that the most common management action that is  
354 documented is listing in a CITES Appendix. All cycads, for example, are included on CITES  
355 Appendix II through a higher-taxon listing (representing 229 out of the 255 threatened or NT  
356 cycad species in this analysis). Very few species have a national harvest management plan in  
357 place, although these appear to be more readily available for aquatic species, such as  
358 cartilaginous fishes, which have traditionally been under-represented in CITES. The high

359 numbers of species threatened by use stresses the value of national management plans being in  
360 place. Of course, many species impacted by biological resource use benefit from conservation  
361 actions that we did not directly investigate, such as the establishment and management of  
362 protected areas, community-based resource management, and other site-based interventions,  
363 while some are subject to measures to reduce demand.

364

365 There are several important caveats to our analyses. First, our study focuses on intentional forms  
366 of biological resource use, but the impacts of use extend well beyond the direct impacts on the  
367 species being targeted. The most evident examples of this are deforestation (specifically logging)  
368 in the terrestrial realm and by-catch in the aquatic realm. While logging is clearly a major direct  
369 threat to timber species, it can also have severe repercussions on forest-dependent species. For  
370 example, some 55% of NT and threatened bird species are threatened by the unintentional effects  
371 of logging (IUCN 2020). Likewise, while commercial fishing is a direct threat to many target  
372 fisheries, by-catch is a major recognized threatening process in the sea (Komoroske & Lewison  
373 2015). Our analysis only included by-catch for cartilaginous fishes where parts (e.g., fins, gills)  
374 of by-caught species frequently enter trade.

375

376 Second, we focused our analysis on 13 taxonomic groups that have been comprehensively  
377 assessed on the Red List, but our estimates of the extent of use of reptiles and dicotyledonous  
378 plants may be inflated because the families and orders included in our analysis are not  
379 necessarily representative of the broader diversity in the class (and are possibly more likely to be  
380 used). We also excluded DD and EX/EW species throughout our analyses. For DD species,  
381 assessors were not able to assign a category of extinction risk due to uncertainty in the



382 assessment, including on the severity of threatening processes (Bland et al. 2017), such as over-  
383 exploitation; while many DD species may prove to be threatened, some have also been shown to  
384 be more widely distributed or common than previously understood (Butchart & Bird 2010).  
385 Unsustainable exploitation is already understood to have driven many species to extinction, such  
386 as the Dodo *Raphus cucullatus* and Steller’s Sea Cow *Hydrodamalis gigas*. At least 12% (102)  
387 of species listed as recently (since 1500) Extinct on the Red List have intentional use indicated as  
388 a threat that led to the species’ extinction (IUCN 2020).

389

390 Third, our study is dependent on the information captured under the IUCN classification  
391 schemes. Because some information is indicated as “required” while some is “recommended”,  
392 our analyses are constrained by the degree to which this information has been coded up  
393 consistently. Even where the information has been coded, assessors may not always be aware of  
394 the full range of threats, uses or actions that apply. For example, in completing the “Use and  
395 Trade” module, full consideration may not always be given to traditional or indigenous uses;  
396 IUCN is currently preparing guidelines that would help assessors take such uses into account.  
397 The Red List assessment process has to delicately balance the time and resource constraints  
398 faced by individual assessors (Rondinini et al. 2013), with the need to ensure there is at least a  
399 minimum level of supporting documentation in place to underpin an assessment and inform  
400 conservation. Recognizing that the documentation requirements are the outcome of prolonged  
401 discussions that carefully weigh up these concerns, we cannot propose that these fields be made  
402 mandatory for assessors.

403

404 Considering the above, we propose a few recommendations (Table 2) that would help to reduce  
405 the proportion of used species – currently nearly half – for which we have no evidence as to  
406 whether use is sustainable or not. Recommendation one concerns coding of the threat category  
407 “motivation unknown”. In the current Threats Classification Scheme, if the assessor does not  
408 know the scale of harvest (i.e., whether “subsistence/small scale” or “large scale”), their only  
409 option is to select the option for “motivation unknown / unrecorded” under the sections 5.3  
410 (logging & wood harvesting) and 5.4. (fishing & harvesting aquatic resources), even though they  
411 are likely to know whether the use is intentional or unintentional. For instance, we found 1,519  
412 amphibian species for which “logging and wood harvesting” was coded as a threat, of which  
413 1,187 species threats were recorded under “motivation unknown”, but the motivation must have  
414 been unintentional as these species are impacted through the loss of forest, not through direct  
415 exploitation. Although our methodology excludes these cases from our analyses, we propose a  
416 modification to the Threats Classification Scheme for assessors to indicate where the motivation  
417 is known, but the scale is not, to avoid these coding issues in the future (Supporting  
418 Information).

419

420 Recommendation two is that data on timing, scope and severity of threats should be better coded  
421 as it would allow us to tease out more effectively where threat impacts are medium to high and  
422 bring greater precision to our results. For corals and cone snails, the threat of biological resource  
423 use is likely to be small in comparison with the impacts of bleaching and disease for corals  
424 (Carpenter et al. 2008), and urban pollution, tourism and coastal development for cone snails  
425 (Peters et al. 2013). Further, it would be useful to better understand and quantify the degree to  
426 which species can be subject to some level of use without this resulting in them becoming

427 threatened (i.e., impact is low, highly localized, negligible or no impact), but this requires that  
428 the effects of use are more consistently recorded for LC species (Recommendation three).  
429  
430 Recommendation four is to encourage assessors to code up important conservation actions in  
431 place and needed. Our results based on analysis of data in the Conservation Actions  
432 Classification Schemes are particularly constrained because data are available for only a limited  
433 number of species. For example, while our results show that very few species have a harvest  
434 management plan in place, for only one taxonomic group (conifers) do more than half of NT and  
435 threatened species actually have this field coded as opposed to left blank (Supporting  
436 Information). Whether international trade control is in place is generally better documented than  
437 whether a harvest management plan is in place, likely because information on whether species  
438 are in a CITES Appendix or subject to some other policy controls is easier to obtain than whether  
439 a harvest management plan is in place. Finally, the addition of a simple check-box to indicate  
440 whether or not the classification schemes for a given species assessment have been filled in at the  
441 Recommended level, would be a powerful addition to the Red List documentation  
442 (Recommendation five).  
443  
444 As previous studies have shown, Red List data can play a key role in supporting major global  
445 assessment processes, and by extension broader international policy. Our study uses Red List  
446 data to quantify the degree to which the use of wild species either does or does not impact  
447 negatively on species extinction risk, and thus whether documented use may be biologically  
448 sustainable or unsustainable. Our ability to disentangle the nature and extent of this use could be  
449 considerably improved through some minor amendments to established Red List protocols and

450 through greater efforts by assessors and Red List assessment initiatives to ensure, wherever  
451 possible, more consistent coding of the information and data underpinning Red List assessments.  
452 Nonetheless, our findings show that while over-exploitation is clearly a direct threat to many  
453 species, and indeed has already driven some to extinction, there are also many species for which  
454 use is clearly currently taking place at levels that are not likely to be contributing to an increase  
455 in their extinction risk. More effort needs to be invested in understanding the factors that  
456 determine whether use is sustainable, and the effectiveness of different mitigation actions.

457

458

#### 459 **Literature Cited**

460

461 Auliya, M. et al. 2016. The global amphibian trade flows through Europe: the need for enforcing  
462 and improving legislation. *Biodiversity and Conservation* **25**:2581–2595.

463

464 Austin B. J., and B. Corey. 2012. Factors contributing to the longevity of the commercial use of  
465 crocodiles by Indigenous people in remote Northern Australia: a case study. *The Rangeland*  
466 *Journal* **34**:239–248.

467

468 Beech, E., M. Barstow, and M. Rivers. 2017. *The Red List of Theaceae*. BGCI. Richmond,  
469 United Kingdom.

470

471 Bland, L. M., J. Bielby, S. Kearney, C. D. L. Orme, J. E. M. Watson, and B. Collen. 2017.

472 Toward reassessing data-deficient species. *Conservation Biology* **31**:531–539.

473

474 Bonwitt, J., M. Dawson, M. Kandeh, R. Ansumana, F. Sahr, H. Brown, and A.H. Kelly. 2018.

475 Unintended consequences of the 'bushmeat ban' in West Africa during the 2013-2016 Ebola virus

476 disease epidemic. *Social Science & Medicine* **200**:166–173.

477

478 Brooks, T. M. et al. 2016. Analyzing Biodiversity and Conservation Knowledge Products to

479 Support Regional Environmental Assessments. *Scientific Data* **3**:160007.

480

481 Brooks, T. M., S. H. M. Butchart, N. A. Cox, M. Heath, C. Hilton-Taylor, M. Hoffmann, N.

482 Kingston, J. P. Rodríguez, S. N. Stuart, and J. Smart. 2015. Harnessing biodiversity and

483 conservation knowledge products to track the Aichi Targets and Sustainable Development Goals.

484 *Biodiversity* **16**:157–174.

485

486 Bruckner, A. W. 2000. New threat to coral reefs: trade in coral organisms. *Issues in Science and*

487 *Technology* **17**:63–68.

488

489 Butchart, S. H. M. 2008. Red List Indices to measure the sustainability of species use and

490 impacts of invasive alien species. *Bird Conservation International* **18**:S245–S262.

491

492 Butchart, S. H. M., and J. P. Bird. Data Deficient birds on the IUCN Red List: What don't we

493 know and why does it matter? *Biological Conservation* **143**(1):239–247.

494

495 Cannas, R., M. C. Follesa, A. Cau, A. Cau, and K. Friedman. 2019. Global report on the biology,  
496 fishery and trade of precious corals. Pages 1–189, and 191–254. FAO Fisheries and Aquaculture  
497 Circular No. 1184. Rome, FAO.

498

499 Challender, D. W. S. et al. 2019. Criteria for CITES species protection. *Science* **364**(6437):247–  
500 248.

501

502 Challender, D. W. S., and D. C. MacMillan. 2019. Investigating the influence of Non-state  
503 Actors on amendments to the CITES Appendices. *Journal of International Wildlife Law &*  
504 *Policy* **22**:90–114.

505

506 Collen, B. et al. 2016. Clarifying misconceptions of extinction risk assessment with the IUCN  
507 Red List. *Biology Letters* **12**(4):20150843.

508

509 Cooney, R., and P. Jepson. 2006. The international wild bird trade: what's wrong with blanket  
510 bans? *Oryx* **40**:18–23.

511

512 Di Minin, E. et al. 2019. Identifying global centers of unsustainable commercial harvesting of  
513 species. *Science Advances* **5**(4):p.eaau2879.

514

515 Dulvy, N. K. et al. 2014. Extinction risk and conservation of the world's sharks and rays. *eLife*  
516 DOI: 10.7554/eLife.00590.

517

518 Eaton, J. A., M. D. T. Nguyen, M. Willemsen, J. Lee, and S. C. L. Chng. 2017. Caged in the city:  
519 An inventory of birds for sale in Ha Noi and Ho Chi Minh City, Viet Nam. TRAFFIC Southeast  
520 Asia Regional Office, Petaling Jaya, Malaysia.

521

522 Goettsch, B., et al. 2015. High Proportion of cactus species threatened with extinction. *Nature*  
523 *Plants* **1**:15142.

524

525 Hutton, J. M., and N. Leader-Williams. 2003. Sustainable use and incentive-driven conservation:  
526 realigning human and conservation interests. *Oryx* **37**:215–226.

527

528 IPBES. 2019. Summary for policymakers of the global assessment report on biodiversity and  
529 ecosystem services of the Intergovernmental Science-Policy Platform on Biodiversity and  
530 Ecosystem Services. Bonn, Germany. Available from <https://ipbes.net/ga/spm> (accessed June  
531 2020).

532

533 IUCN. 2000. The IUCN Policy Statement on Sustainable Use of Wild Living Resources.  
534 Cambridge, United Kingdom. Available from <https://www.iucnredlist.org/> (accessed June 2020).

535

536 IUCN. 2016. Rules of Procedure for IUCN Red List Assessments 2017–2020, version 3.0.  
537 Cambridge, United Kingdom. Available from [https://www.iucnredlist.org/resources/rules-of-](https://www.iucnredlist.org/resources/rules-of-procedure)  
538 [procedure](https://www.iucnredlist.org/resources/rules-of-procedure) (accessed June 2020).

539

540 IUCN. 2020. The IUCN Red List of Threatened Species, version 2020-1. Cambridge, United  
541 Kingdom. Available from <https://www.iucnredlist.org/> (accessed June 2020).

542

543 IUCN 2020. Threats Classification Scheme (Version 3.2). Cambridge, United Kingdom.

544 Available from <https://www.iucnredlist.org/resources/threat-classification-scheme> (accessed  
545 June 2020).

546

547 Komoroske, L. M., and R. L. Lewison. 2015. Addressing fisheries bycatch in a changing world.

548 *Frontiers in Marine Science* **2**:83.

549

550 Lichtenstein, G. 2010. Vicuña conservation and poverty alleviation? Andean communities and

551 international fibre markets. *International Journal of the Commons* **4**:100–121.

552

553 Luther, D. A., T. M. Brooks, S. H. Butchart, M. W. Hayward, M. E. Kester, J. Lamoreux, and A.

554 Upgren. 2016. Determinants of bird conservation-action implementation and associated

555 population trends of threatened species. *Conservation Biology* **30**:1338–1346.

556

557 MacNeil, M. A. et al. 2020. Global status and conservation potential of reef sharks. *Nature*

558 **583**:801–806.

559

560 Maxwell, S. L., R. A. Fuller, T. M. Brooks, and J. E. M. Watson. 2016. The Ravages of Guns,

561 Nets and Bulldozers. *Nature* **536**(7615):143–45.

562



563 Miqueleiz, I., M. Böhm, A. H. Ariño, and R. Miranda. 2020. Assessment gaps and biases in  
564 knowledge of conservation status of fishes. *Aquatic Conservation* **30**:225–236.  
565

566 Nasi, R., A. Taber, and N. van Vliet. 2011. Empty forests, empty stomachs? Bushmeat and  
567 livelihoods in the Congo and Amazon Basins. *International Forestry Review* **13**:355–368.  
568

569 Peters, H., B. C. O’Leary, J. P. Hawkins, K. E. Carpenter, and C. M. Roberts. 2013. Conus: First  
570 Comprehensive Conservation Red List Assessment of a Marine Gastropod Mollusc Genus. *PLoS*  
571 *ONE* DOI:10.1371/journal.pone.0083353.  
572

573 Rondinini, C., M. Di Marco, P. Visconti, S. H. M. Butchart, and L. Boitani. 2013. Update or  
574 outdate: long-term viability of the IUCN Red List. *Conservation Letters* **7**:126–130.  
575

576 Salafsky, N. D., et al. 2008. A Standard Lexicon for Biodiversity Conservation: Unified  
577 Classifications of Threats and Actions. *Conservation Biology* **22**(4):897–911.  
578

579 Scheffers, B. R., B. F. Oliveira, L. Lamb, and D. P. Edwards. 2019. Global wildlife trade across  
580 the tree of life. *Science* **366**:71–76.  
581

582 Secretariat of the Convention on Biological Diversity. 2014. *Global Biodiversity Outlook 4*.  
583 Montréal.  
584

585 Thilsted, S. H., A. Thorne-Lyman, P. Webb, J. R. Bogard, R. Subasinghe, M. J. Phillips, E. H.

586 Allison. 2016. Sustaining healthy diets: the role of capture fisheries and aquaculture for

587 improving nutrition in the post-2015 era. *Food Policy* **61**:126–131.

588

589

590

591

592 A

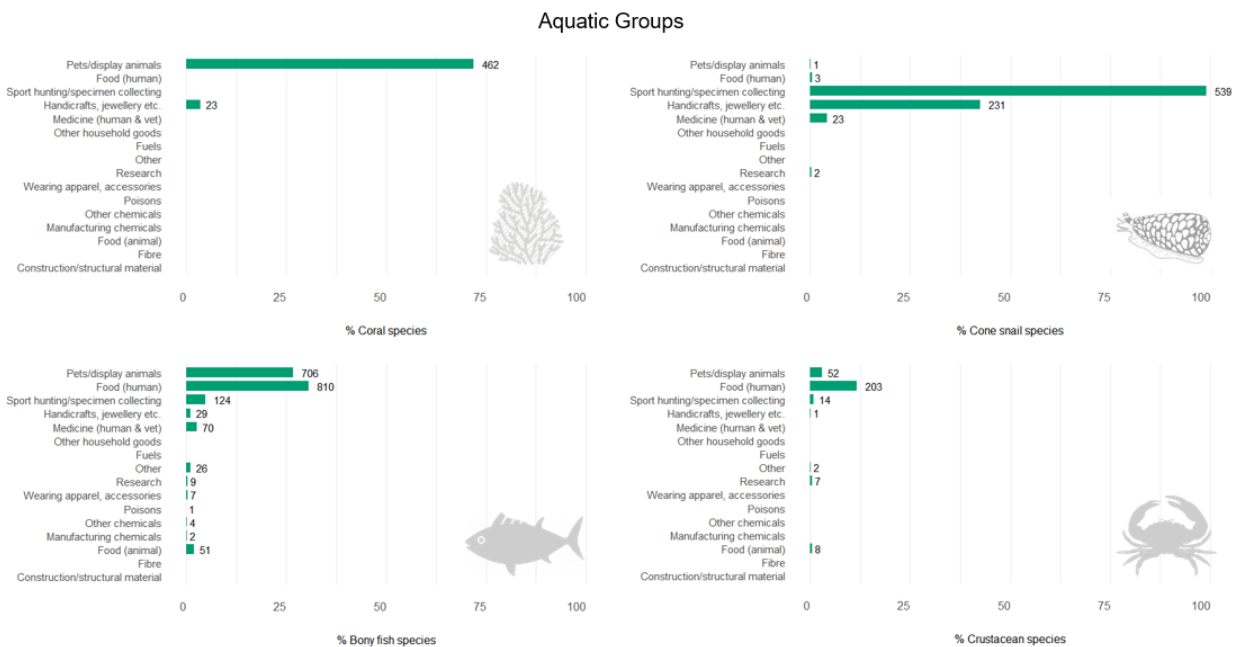

593

594 B

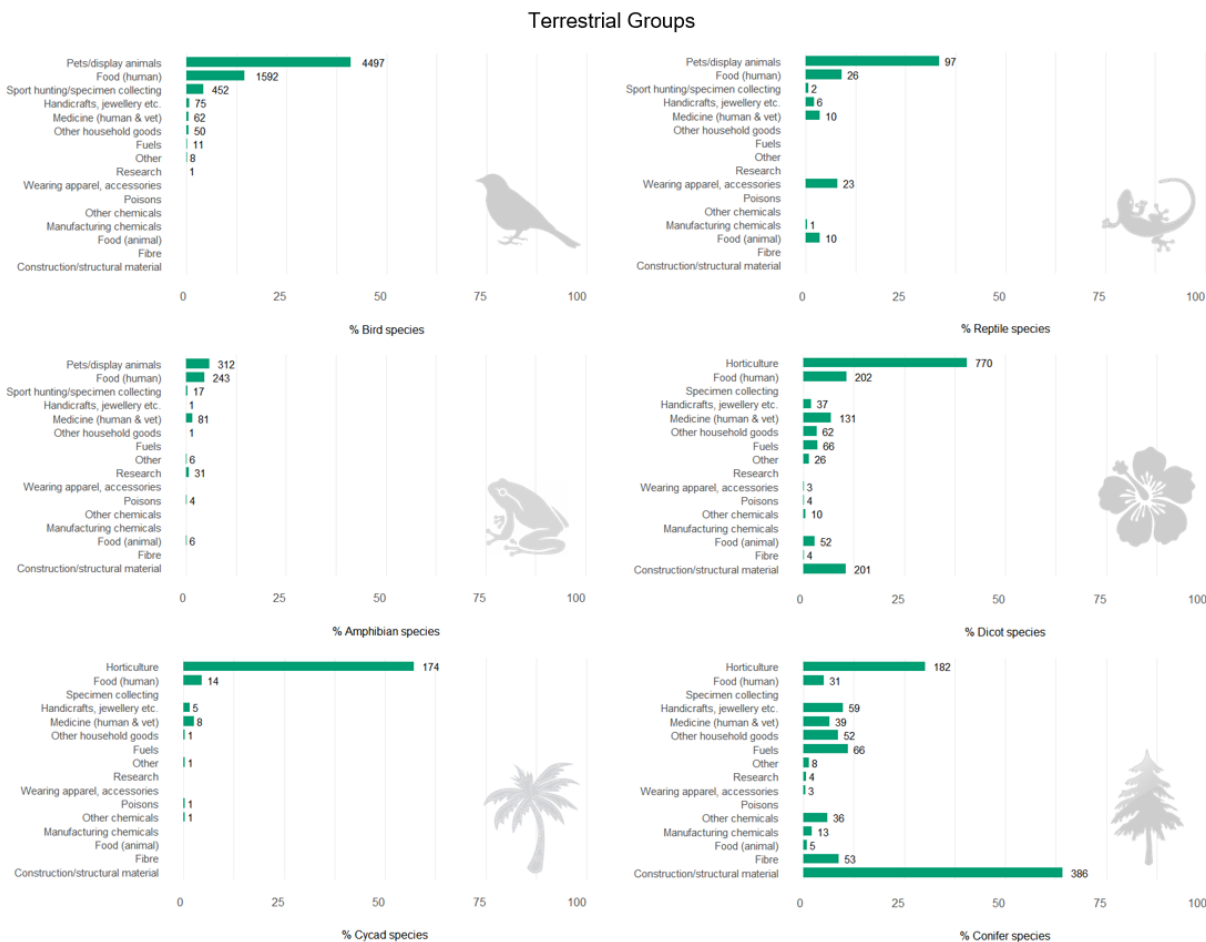

595  
 596 Figure 1. Percentage of extant, data sufficient species in A) aquatic and B) terrestrial taxonomic  
 597 groups, recorded for different types of use on the Red List. Percentages out of total extant, data  
 598 sufficient species (see Table 1). Data labels show the total number of species recorded for each  
 599 purpose of use. Note that most species are subject to more than one type of use.

600  
 601  
 602  
 603  
 604  
 605

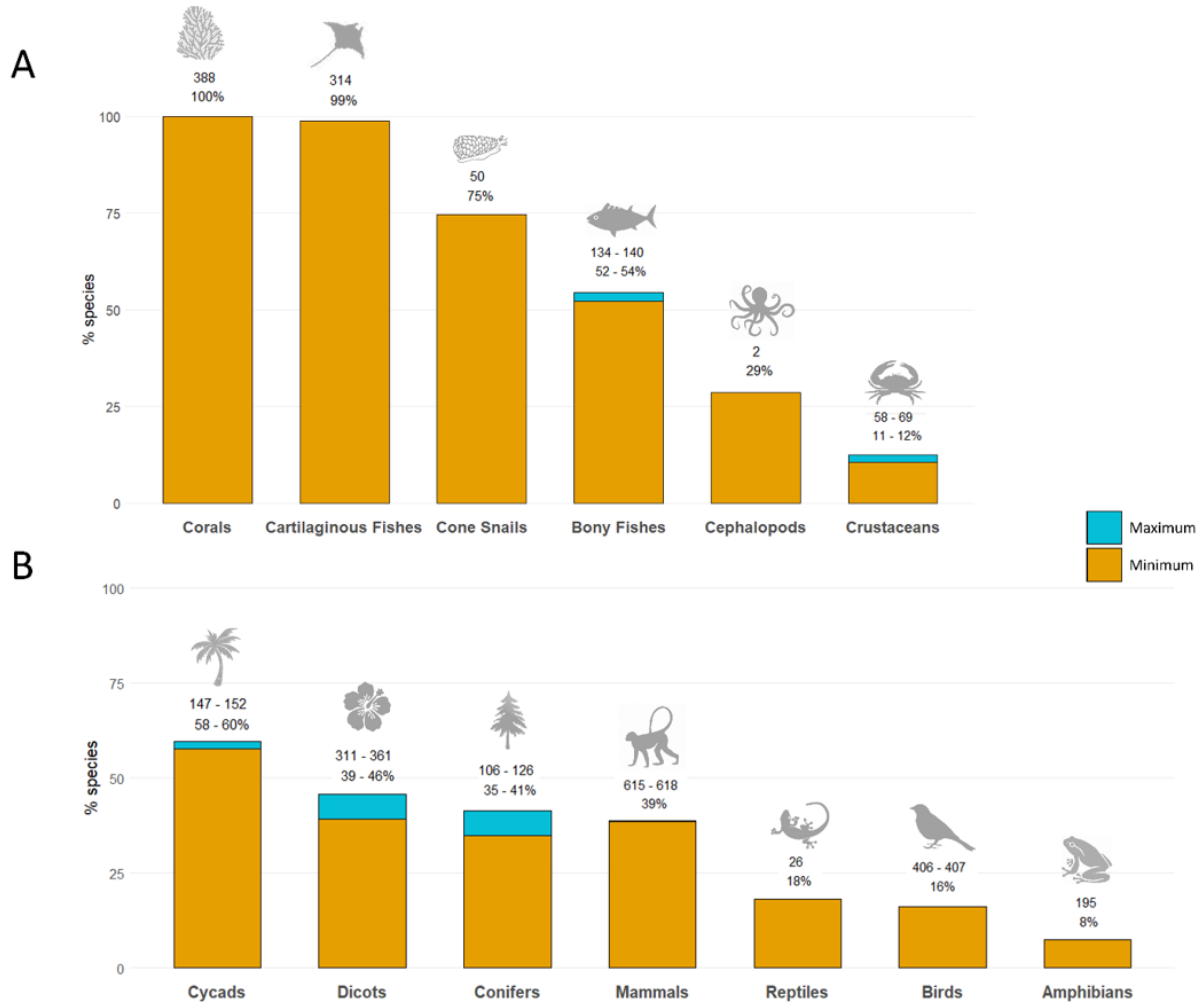

606

607

608 Figure 2. Percentage of NT and threatened species in A) aquatic and B) terrestrial groups with  
 609 biological resource use documented as a threat on the Red List. Minimum (orange) bars are  
 610 defined by the number of species in each taxonomic group that are affected by at least one type  
 611 of intentional use; maximum (blue) bars are species that might be subject to intentional use,  
 612 including where species are coded as threatened by use under “motivation unknown”. Black  
 613 labels denote the minimum number of species affected by biological resource use in each  
 614 taxonomic group, and the percentage range from minimum to maximum (where relevant).

615

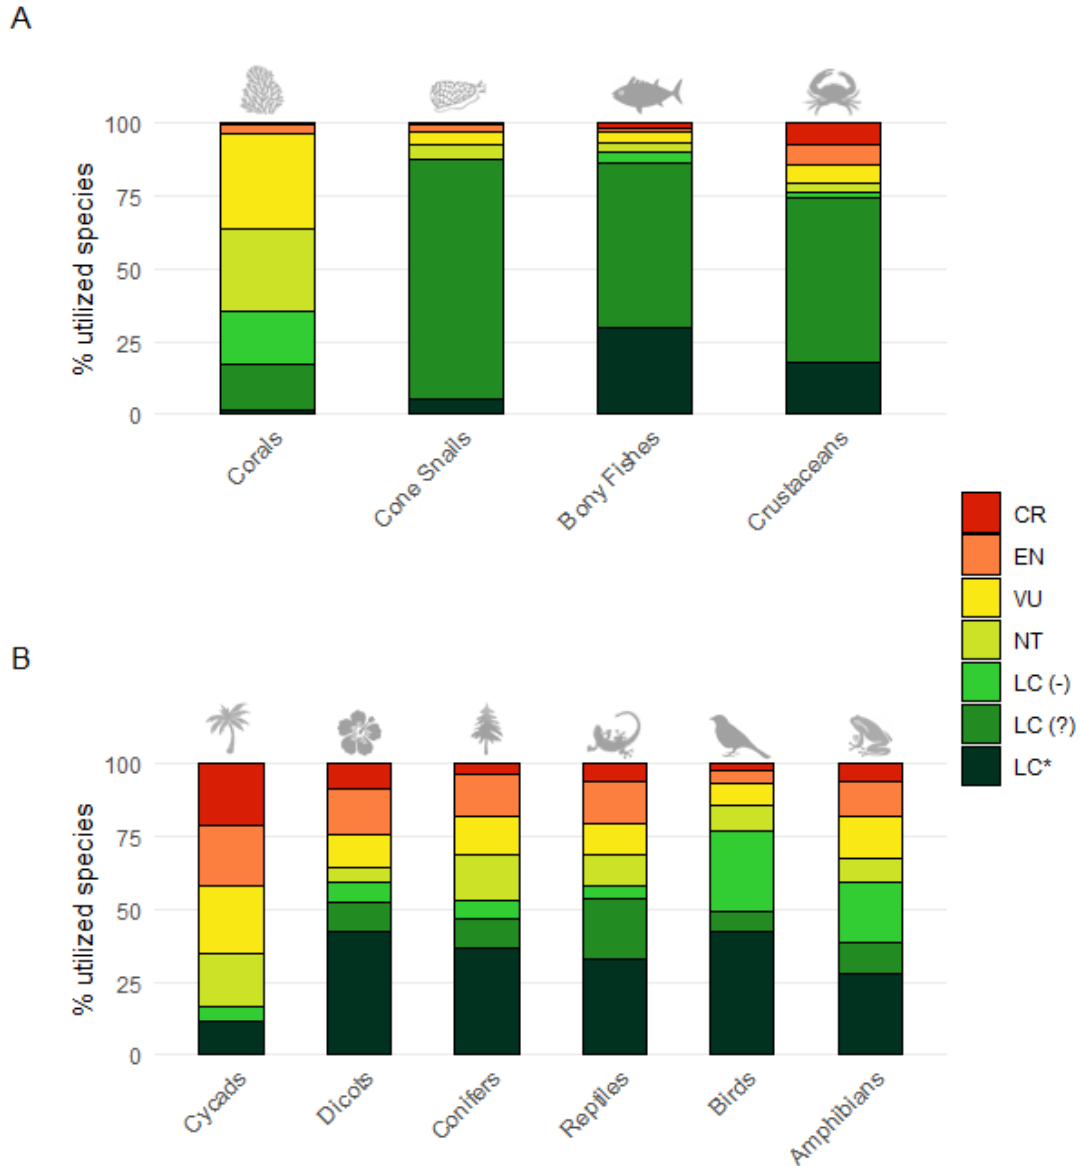

616

617 Figure 3. Percentage of extant, data sufficient species by Red List Category in A) aquatic and B)

618 terrestrial groups that are subject to use and trade. LC(-) = Least Concern species with declining

619 population trend; LC(?) = Least Concern species with unknown population trend; LC(\*) = Least

620 Concern species with stable or increasing population trend. Note that being LC and having a

621 declining population trend, or being threatened and being subject to use and trade, does not

622 imply that use is a major threat; we have no evidence as to whether use is sustainable or not for

623 48% of used species.

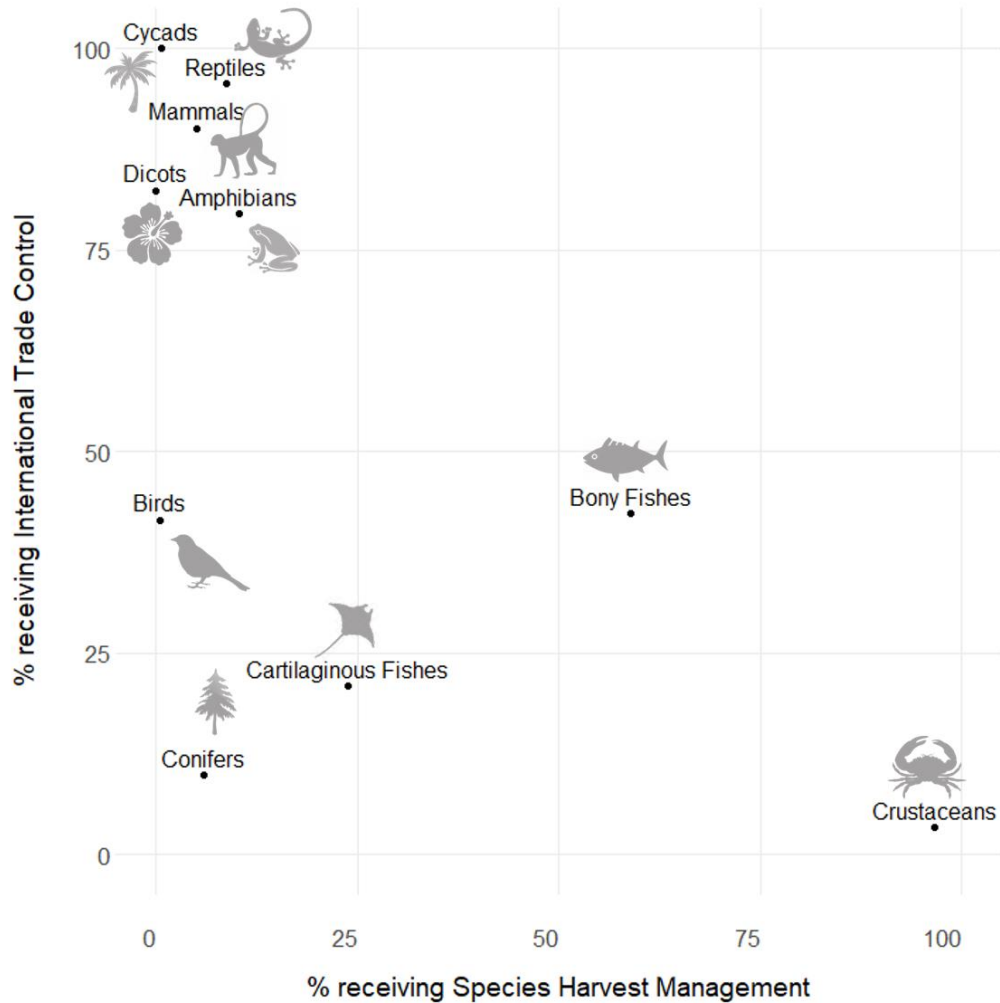

624

625 Figure 4. Relationship between the prevalence of international trade control and species harvest  
626 management across NT and threatened species threatened by intentional biological resource use  
627 (minimum estimate), based only on those species with available data on conservation actions  
628 (those where the field is coded as either “Unknown,” “Yes,” or “No”, rather than left blank). No  
629 data are available for cephalopods, cone snails or corals (see Figure S3).

630

631

| <i>Taxonomic group</i> | <i>Species data</i> |       | <i>Documentation of use</i> |       | <i>Documentation of threats, including biological resource use (BRU)</i> |       |                 |           | <i>Documentation of species management actions</i> |                 |                              |
|------------------------|---------------------|-------|-----------------------------|-------|--------------------------------------------------------------------------|-------|-----------------|-----------|----------------------------------------------------|-----------------|------------------------------|
|                        | n*                  | n**   | Use*                        | Use** | Threats*                                                                 | BRU*  | Intentional BRU |           | Documented**                                       | Intentional BRU |                              |
|                        |                     |       |                             |       |                                                                          |       | Minimum**       | Maximum** |                                                    | Minimum**       | Targeted species management* |
| <i>Aquatic</i>         | 6,603               | 1,589 | 2,674                       | 577   | 3,187                                                                    | 2,047 | 946             | 963       | 277                                                | 236             | 158                          |
| Bony fishes            | 2,649               | 257   | 1,386                       | 137   | 984                                                                      | 542   | 134             | 140       | 95                                                 | 78              | 74                           |
| Crustaceans            | 1,749               | 552   | 263                         | 63    | 750                                                                      | 140   | 58              | 69        | 46                                                 | 24              | 29                           |
| Cartilaginous fishes   | 686                 | 318   | N/A                         | N/A   | 582                                                                      | 571   | 314             | 314       | 136                                                | 134             | 55                           |
| Corals                 | 643                 | 388   | 481                         | 311   | 643                                                                      | 643   | 388             | 388       | 0                                                  | 0               | 0                            |
| Cone snails            | 545                 | 67    | 544                         | 66    | 129                                                                      | 102   | 50              | 50        | 0                                                  | 0               | 0                            |
| Cephalopods            | 331                 | 7     | N/A                         | N/A   | 99                                                                       | 49    | 2               | 2         | 0                                                  | 0               | 0                            |
| <i>Terrestrial</i>     | 24,320              | 8,164 | 7,424                       | 2,230 | 11,565                                                                   | 2,669 | 1,806           | 1,885     | 4,450                                              | 1,363           | 827 - 831                    |
| Birds                  | 10,930              | 2,503 | 4,988                       | 1,136 | 2,745                                                                    | 445   | 406             | 407       | 2,491                                              | 406             | 171                          |
| Amphibians             | 5,406               | 2,577 | 576                         | 235   | 4,281                                                                    | 373   | 195             | 195       | 91                                                 | 39              | 35                           |
| Mammals                | 4,897               | 1,591 | N/A                         | N/A   | 2,540                                                                    | 935   | 615             | 618       | 717                                                | 441             | 406 - 407                    |
| Dicots                 | 1,898               | 791   | 1,094                       | 441   | 1,228                                                                    | 511   | 311             | 361       | 552                                                | 231             | 196 - 199                    |
| Conifers               | 602                 | 304   | 458                         | 215   | 358                                                                      | 186   | 106             | 126       | 251                                                | 89              | 13                           |
| Cycads                 | 300                 | 255   | 177                         | 148   | 219                                                                      | 168   | 147             | 152       | 229                                                | 134             | 138                          |
| Reptiles               | 287                 | 143   | 131                         | 55    | 194                                                                      | 51    | 26              | 26        | 119                                                | 23              | 22                           |
| <i>Total</i>           | 30,923              | 9,753 | 10,098                      | 2,807 | 14,752                                                                   | 4,716 | 2,752           | 2,848     | 4,727                                              | 1,599           | 985 - 989                    |

Table 1. Comprehensively assessed species groups included in the analyses and respective sample sizes.<sup>1</sup>

---

<sup>1</sup> Bony fishes, dicotyledons (dicots) and reptiles include selected higher-level taxa. Species data: number of species in the dataset; Documentation of use: number of species with data coded up in the Use and Trade Classification Scheme, excluding for purpose of ex situ propagation, 'other' or 'unknown' (cephalopods, cartilaginous fishes and mammals were excluded due to insufficient data); Documentation of threats, including biological resource use: number of species with any "Threats" coded in the Threats Classification Scheme, number of species with Biological Resource Use ("BRU"; Threats Classification Scheme 5) coded as a threat, number of species impacted by "Intentional BRU" ("Minimum" and "Maximum"; see Analyses); Documentation of species management actions: number of species with coding of either harvest management plan or international trade controls "Documented" (yes, no, unknown) in the Conservation Actions Classification Scheme ("Actions"), the "Minimum" number of these species impacted by intentional BRU, and the subset of these receiving "Targeted species management" actions for BRU (i.e., with either a harvest management plan or international trade controls in place: yes or unknown, shown as range); \*number of extant, data sufficient species; \*\*number of species assessed as NT or threatened



| Recommendation | Proposal                                                                                                                                                                                     | IUCN protocol or system affected                                                                                                            |
|----------------|----------------------------------------------------------------------------------------------------------------------------------------------------------------------------------------------|---------------------------------------------------------------------------------------------------------------------------------------------|
| 1              | Modify the Threats Classification Scheme for classes 5.3 and 5.4 for assessors to indicate where the motivation is known, but the scale is not                                               | Threats Classification Scheme (Class 5)                                                                                                     |
| 2              | Coding of scope and severity of threats becomes Recommended information for taxa listed as EX, EW, threatened or NT                                                                          | Required and Recommended Supporting Information for IUCN Red List Assessments (annex 1 of Rules of Procedure for IUCN Red List Assessments) |
| 3              | Documentation of threats (with timing, scope and severity) becomes Recommended information for LC species                                                                                    | Required and Recommended Supporting Information for IUCN Red List Assessments (annex 1 of Rules of Procedure for IUCN Red List Assessments) |
| 4              | Assessments for taxa prioritized in the IUCN Red List Strategic Plan comply with the Recommended documentation requirements                                                                  | No change (support for current protocol)                                                                                                    |
| 5              | Addition of a check-box to the Species Information Service to indicate whether or not the classification schemes for a given species assessment have been filled in at the Recommended level | Species Information Service                                                                                                                 |

632

633 Table 2. Recommendations for improving consistency and available information in use-related

634 Red List data.
